# Supplementary material for: Evaluation of an Oral Fluid Collection Device and a Solid-Phase Extraction Method for the Determination of Coca Leaf Alkaloids by Gas Chromatography–Mass Spectrometry
Source: MDPI journal article supplement (doi:10.3390/molecules29030592), 2024-01-25
Supplement: s1 [file s1]

---

## Supplementary Materials

# Evaluation of an Oral Fluid Collection Device and a Solid-Phase Extraction Method for the Determination of Coca Leaf Alkaloids by Gas Chromatography–Mass Spectrometry

Pamela Cabarcos-Fernández <sup>1,†</sup>, Ivan Álvarez-Freire <sup>1,†</sup>, Nelida Cristina Rubio <sup>1</sup>, Ana Maria Bermejo-Barrera <sup>1</sup>, Antonio Moreda-Piñeiro <sup>2</sup>, Ines Sánchez-Sellero <sup>1</sup> and Maria Jesus Tabernero-Duque <sup>1,\*</sup>

<sup>1</sup> Forensic Toxicology Service. Forensic Sciences Institute, Faculty of Medicine, Universidade de Santiago de Compostela, Rúa de San Francisco, s/n, 15782 Santiago de Compostela, Spain; pamela.cabarcos@usc.es (P.C.-F.); ivan.alvarez@usc.es (I.Á.-F.); cristinarubio2@gmail.com (N.C.R.); anamaria.bermejo@usc.es (A.M.B.-B.); ines.sanchez.sellero@usc.es (I.S.-S.)

<sup>2</sup> Trace Element, Spectroscopy and Speciation Group (GETEE), Institute of Materials iMATUS, Department of Analytical Chemistry, Nutrition and Bromatology, Faculty of Chemistry, Universidade de Santiago de Compostela, Avenida das Ciencias, s/n, 15782 Santiago de Compostela, Spain; antonio.moreda@usc.es

\* Correspondence: mj.tabernero@usc.es

† These authors contributed equally to this work.

---

**Table S1.** Matrix effect equations.

|                                                                             |                                                               |
|-----------------------------------------------------------------------------|---------------------------------------------------------------|
| Matrix Effect equation                                                      | $ME(\%) = \left( \frac{B}{A} - 1 \right) \times 100$          |
| Matrix Effect equation with normalized areas (deuterated internal standard) | $ME_{(n)}(\%) = \left( \frac{B}{A} - 1 \right) \times 100$    |
| Matrix Effect equation using Quantisal® device                              | $ME_Q(\%) = \left( \frac{B_Q}{A} - 1 \right) \times 100$      |
| Matrix Effect equation with normalized areas using Quantisal® device        | $ME_{Q(n)}(\%) = \left( \frac{B_Q}{A} - 1 \right) \times 100$ |

---

**Table S2.** Recovery equations.

| $R_{(x)}$                | $[x \text{ areac}/x \text{ areab}] \times 100^{(.)}$                            |
|--------------------------|---------------------------------------------------------------------------------|
| $R_{(n)}(x/x\text{-d3})$ | $[x \text{ areac}/x\text{-d3}]/[x \text{ areab}/x\text{-d3}] \times 100^{(.,)}$ |

x: EME, CUS, TRO, COC, t-CIN.; x-d3: EME-d3, COC-d3; <sup>(.)</sup> Compound area obtained from Study Design C and B (absolute areas); <sup>(.,)</sup> Compound area obtained from Study Design C and B (normalized areas with deuterated).

**Table S3.** Process Efficiency and Extraction Recovery equations.

| Process Efficiency or Apparent Recovery ( $R_A$ and $R_{A(Q)}$ )                     |  | Extraction Recovery or Extraction Efficiency ( $R_E$ and $R_{E(Q)}$ )                         |  |
|--------------------------------------------------------------------------------------|--|-----------------------------------------------------------------------------------------------|--|
| $R_A (\%) = (\text{absolute area C}/\text{absolute area A}) \times 100$              |  | $R_E (\%) = (\text{absolute area C}/\text{absolute area B}) \times 100$                       |  |
| $R_{A(Q)} (\%) = (\text{absolute area } C_Q/\text{absolute area A}) \times 100$      |  | $R_{E(Q)} (\%) = (\text{absolute area } C_Q/\text{absolute area } B_Q) \times 100$            |  |
| Normalized areas (IS)                                                                |  |                                                                                               |  |
| $R_{A(n)} (\%) = \text{area (C/IS-d3)}/\text{area (A/IS-d3)} \times 100$             |  | $R_{E(n)} (\%) = \text{area (C/IS-d3)}/\text{area (B/IS-d3)} \times 100$                      |  |
| $R_{A(Q)(n)} (\%) = \text{area (C}_Q/\text{IS-d3)}/\text{area (A/IS-d3)} \times 100$ |  | $R_{E(Q)(n)} (\%) = \text{area (C}_Q/\text{IS-d3)}/\text{area (B}_Q/\text{IS-d3)} \times 100$ |  |
